# Supplementary material for: Effect of manganese doping on the hyperthermic profile of ferrite nanoparticles using response surface methodology
Source: Royal Society of Chemistry journal article supplement (doi:10.1039/d1ra02376d), 2021-01-01
Supplement: d1ra02376d1.pdf [file d1ra02376d1.pdf]

## Supplementary Information

### **Effect of Manganese Doping on the Hyperthermic Profile of Ferrite Nanoparticles using Response Surface Methodology**

Ruby Gupta, Ruchi Tomar, Suvankar Chakraverty, Deepika Sharma\*

Institute of Nano Science and Technology, Knowledge City, Phase 81, Mohali-140306,  
Punjab, India

\*Corresponding Author:

deepika@inst.ac.in

Table S1: Results of experimental runs (20 reactions).

| Run order | Fe <sup>3+</sup> /Mn <sup>2+</sup> ratio<br>A | Temperature B (°C) | Time C (h) | Saturated Magnetization R1 (emu/g) |                 | Temperature Rise R2 (°C) |                 |
|-----------|-----------------------------------------------|--------------------|------------|------------------------------------|-----------------|--------------------------|-----------------|
|           |                                               |                    |            | Experimental value                 | Predicted value | Experimental value       | Predicted value |
|           |                                               |                    |            | 1                                  | 13              | 100                      | 4               |
| 2         | 31                                            | 150                | 7          | 74.5                               | 74.22           | 4.0                      | 3.73            |
| 3         | 31                                            | 65.9               | 7          | 71.43                              | 77.52           | 2.6                      | 3.31            |
| 4         | 49                                            | 200                | 4          | 77.46                              | 78.42           | 0.7                      | 0.49            |
| 5         | 31                                            | 150                | 7          | 74.5                               | 74.22           | 3.9                      | 3.73            |
| 6         | 13                                            | 100                | 10         | 64.58                              | 56.80           | 2.2                      | 2.42            |
| 7         | 49                                            | 100                | 10         | 77.19                              | 77.20           | 3.2                      | 2.70            |
| 8         | 13                                            | 200                | 4          | 76.84                              | 70.01           | 1.0                      | 1.52            |
| 9         | 49                                            | 200                | 10         | 82.99                              | 80.89           | 1.6                      | 2.40            |
| 10        | 31                                            | 234                | 7          | 82.49                              | 86.05           | 1.1                      | 0.37            |
| 11        | 13                                            | 200                | 10         | 66.74                              | 63.19           | 3.9                      | 3.82            |
| 12        | 0.7                                           | 150                | 7          | 40.76                              | 50.32           | 3                        | 3.21            |
| 13        | 31                                            | 150                | 7          | 74.5                               | 74.22           | 3.8                      | 3.73            |
| 14        | 31                                            | 150                | 2          | 65.05                              | 70.01           | 4.0                      | 4.36            |
| 15        | 31                                            | 150                | 7          | 74.5                               | 74.22           | 3.8                      | 3.73            |
| 16        | 31                                            | 150                | 12         | 61.7                               | 66.39           | 4.4                      | 4.03            |
| 17        | 31                                            | 150                | 7          | 74.5                               | 74.22           | 3.5                      | 3.73            |
| 18        | 31                                            | 150                | 7          | 74.5                               | 74.22           | 3.4                      | 3.73            |
| 19        | 61                                            | 150                | 7          | 75.21                              | 74.54           | 2.8                      | 2.58            |
| 20        | 49                                            | 100                | 4          | 77.95                              | 74.68           | 5.3                      | 5.39            |
| Optimal   | 42                                            | 100                | 4          | 73                                 | 75              | 8.4                      | 5               |

Table S2: Characterization of Mn-doped Ferrite Nanoparticles ( $Mn_xFe_{3-x}O_4$ ).

| <b>Experimental Run Order</b> | <b>Dopant (x)</b> | <b>Surface Charge (mV)</b> | <b>Hydrodynamic Size (nm)</b> | <b>Crystallite size (nm)</b> | <b>Lattice constant (nm)</b> |
|-------------------------------|-------------------|----------------------------|-------------------------------|------------------------------|------------------------------|
| 1                             | 0.21              | $-16.7 \pm 0.8$            | $273.1 \pm 36.6$              | 14.8                         | 0.8367                       |
| 2                             | 0.08              | $-11.3 \pm 1.1$            | $307.1 \pm 8.5$               | 24.4                         | 0.8378                       |
| 3                             | 0.1               | $-8.2 \pm 0.7$             | $294.6 \pm 66.5$              | 18.3                         | 0.8398                       |
| 4                             | 0.05              | $-13.2 \pm 0.9$            | $310.5 \pm 46.0$              | 14.4                         | 0.8359                       |
| 5                             | 0.08              | $-11.3 \pm 1.1$            | $307.1 \pm 8.5$               | 24.4                         | 0.8378                       |
| 6                             | 0.21              | $-14.9 \pm 0.9$            | $218.7 \pm 24.1$              | 15.9                         | 0.8408                       |
| 7                             | 0.05              | $-13.8 \pm 0.6$            | $313.3 \pm 1.2$               | 26.9                         | 0.8392                       |
| 8                             | 0.16              | $-11.1 \pm 1.4$            | $187.5 \pm 52.5$              | 16.6                         | 0.8440                       |
| 9                             | 0.07              | $-12.5 \pm 0.7$            | $210.5 \pm 117.8$             | 14.9                         | 0.8392                       |
| 10                            | 0.09              | $-10.2 \pm 0.5$            | $256.0 \pm 34.1$              | 24.6                         | 0.8407                       |
| 11                            | 0.21              | $-12.0 \pm 1.1$            | $151.9 \pm 26.8$              | 15.2                         | 0.8376                       |
| 12                            | 0.07              | $-12.2 \pm 0.3$            | $225.0 \pm 54.9$              | 14.7                         | 0.8522                       |
| 13                            | 0.08              | $-11.3 \pm 1.1$            | $307.1 \pm 8.5$               | 24.4                         | 0.8378                       |
| 14                            | 0.09              | $-9.9 \pm 0.7$             | $216.8 \pm 47.5$              | 17.3                         | 0.8366                       |
| 15                            | 0.08              | $-11.3 \pm 1.1$            | $307.1 \pm 8.5$               | 24.4                         | 0.8378                       |
| 16                            | 0.1               | $-7.6 \pm 0.5$             | $215.9 \pm 90.5$              | 10.3                         | 0.8407                       |
| 17                            | 0.08              | $-11.3 \pm 1.1$            | $307.1 \pm 8.5$               | 24.4                         | 0.8378                       |
| 18                            | 0.08              | $-11.3 \pm 1.1$            | $307.1 \pm 8.5$               | 24.4                         | 0.8378                       |
| 19                            | 0.05              | $-11.8 \pm 0.5$            | $388.2 \pm 23.8$              | 17.6                         | 0.8366                       |
| 20                            | 0.06              | $-14.9 \pm 0.8$            | $173.6 \pm 58.8$              | 15.4                         | 0.8376                       |
| Optimal sample                | 0.07              | $-11.3 \pm 0.4$            | $278.2 \pm 14.8$              | 19.2                         | 0.8292                       |

Table S3: Magnetic and hyperthermic properties of Mn-doped Ferrite Nanoparticles ( $Mn_xFe_{3-x}O_4$ ).

| <b>Experimental Run Order</b> | <b>Ms (emu/g)</b> | <b>Mr (emu/g)</b> | <b>Hc (Oe)</b> | <b>SAR (W/g)</b> | <b>ILP (nHm<sup>2</sup>/kg)</b> |
|-------------------------------|-------------------|-------------------|----------------|------------------|---------------------------------|
| 1                             | 68.30             | 0                 | 0.43           | 41.85            | 0.58                            |
| 2                             | 74.5              | 4.91              | 10.34          | 6.98             | 0.096                           |
| 3                             | 71.43             | 3.64              | 75.25          | 6.98             | 0.096                           |
| 4                             | 77.46             | 12.73             | 152.86         | 3.49             | 0.048                           |
| 5                             | 74.5              | 4.91              | 35.85          | 6.98             | 0.096                           |
| 6                             | 64.58             | 2.35              | 67.26          | 6.98             | 0.096                           |
| 7                             | 77.19             | 2.71              | 9.33           | 13.95            | 0.19                            |
| 8                             | 76.84             | 4.97              | 84.32          | 20.93            | 0.29                            |
| 9                             | 82.99             | 6.62              | 130.0          | 6.98             | 0.096                           |
| 10                            | 82.49             | 12.97             | 50.98          | 3.49             | 0.048                           |
| 11                            | 66.74             | 0.78              | 17.82          | 13.95            | 0.19                            |
| 12                            | 40.76             | 13.53             | 156.12         | 6.98             | 0.10                            |
| 13                            | 74.5              | 4.91              | 14.32          | 6.98             | 0.10                            |
| 14                            | 65.05             | 0                 | 69.38          | 13.95            | 0.19                            |
| 15                            | 74.5              | 4.91              | 65.53          | 6.98             | 0.10                            |
| 16                            | 61.7              | 7.2               | 135.0          | 20.93            | 0.29                            |
| 17                            | 74.5              | 4.91              | 32.97          | 6.98             | 0.10                            |
| 18                            | 74.5              | 4.91              | 73.27          | 6.98             | 0.10                            |
| 19                            | 75.21             | 4.5               | 69.5           | 10.46            | 0.14                            |
| 20                            | 77.95             | 0                 | 66.7           | 20.93            | 0.29                            |
| PEG-coated Optimal sample     | 73                | 9.28              | 140            | 76.73            | 1.12                            |

Table S4: The results of ANOVA analysis for R1 response model.

| Source         | Sum of Squares | df | Mean Square | F-value | p-value |
|----------------|----------------|----|-------------|---------|---------|
| <b>Model</b>   | 1306.28        | 9  | 145.14      | 4.01    | 0.0205  |
| A-Fe/Mn ratio  | 708.21         | 1  | 708.21      | 19.58   | 0.0013  |
| B-Temperature  | 87.71          | 1  | 87.71       | 2.42    | 0.1505  |
| C-Time         | 15.79          | 1  | 15.79       | 0.4364  | 0.5238  |
| AB             | 3.63           | 1  | 3.63        | 0.1004  | 0.7579  |
| AC             | 43.20          | 1  | 43.20       | 1.19    | 0.3001  |
| BC             | 0.0010         | 1  | 0.0010      | 0.0000  | 0.9959  |
| A <sup>2</sup> | 250.66         | 1  | 250.66      | 6.93    | 0.0251  |
| B <sup>2</sup> | 102.93         | 1  | 102.93      | 2.85    | 0.1225  |
| C <sup>2</sup> | 65.41          | 1  | 65.41       | 1.81    | 0.2084  |

Table S5: The results of ANOVA analysis for R2 response model.

| Source         | Sum of Squares | df | Mean Square | F-value | p-value |
|----------------|----------------|----|-------------|---------|---------|
| <b>Model</b>   | 31.25          | 9  | 3.47        | 8.15    | 0.0015  |
| A-Fe/Mn ratio  | 0.4711         | 1  | 0.4711      | 1.11    | 0.3178  |
| B-Temperature  | 10.41          | 1  | 10.41       | 24.43   | 0.0006  |
| C-Time         | 0.1290         | 1  | 0.1290      | 0.3028  | 0.5942  |
| AB             | 1.44           | 1  | 1.44        | 3.39    | 0.0953  |
| AC             | 0.0800         | 1  | 0.0800      | 0.1878  | 0.6740  |
| BC             | 10.58          | 1  | 10.58       | 24.84   | 0.0006  |
| A <sup>2</sup> | 1.27           | 1  | 1.27        | 2.99    | 0.1144  |
| B <sup>2</sup> | 6.44           | 1  | 6.44        | 15.12   | 0.0030  |
| C <sup>2</sup> | 0.3795         | 1  | 0.3795      | 0.8909  | 0.3675  |

Table S6: Structure coordinates of the  $Mn_xFe_{3-x}O_4$  system.

| Elements    | A     | B                   | O                   |
|-------------|-------|---------------------|---------------------|
| Coordinates | 0,0,0 | 0.625, 0.625, 0.625 | 0.375, 0.375, 0.375 |

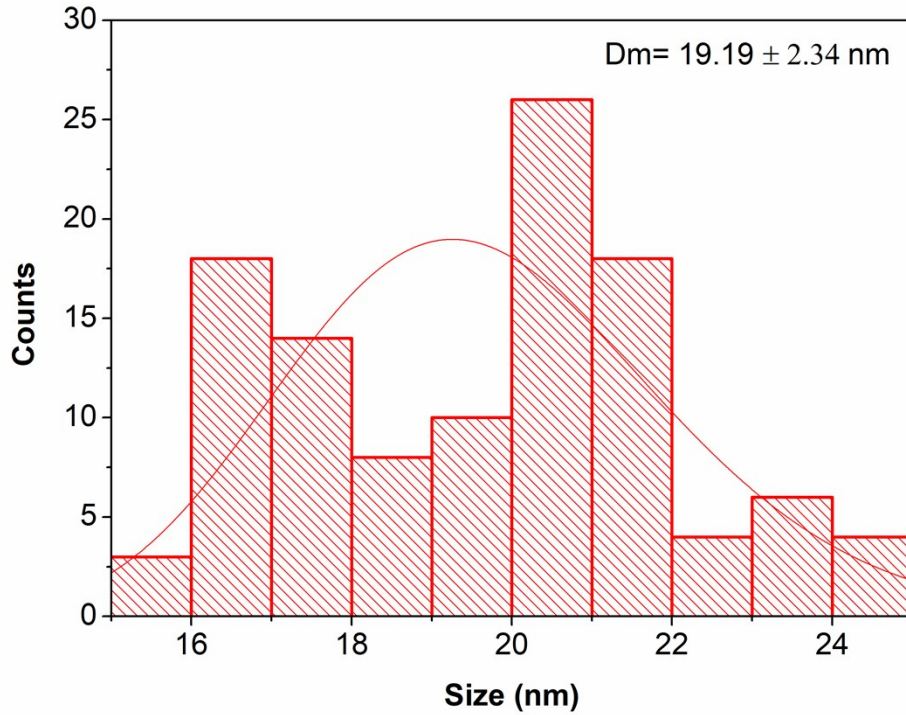

Figure S1: Size distribution histogram of the optimal sample synthesized.  $D_m$  represents the mean diameter of the particles.

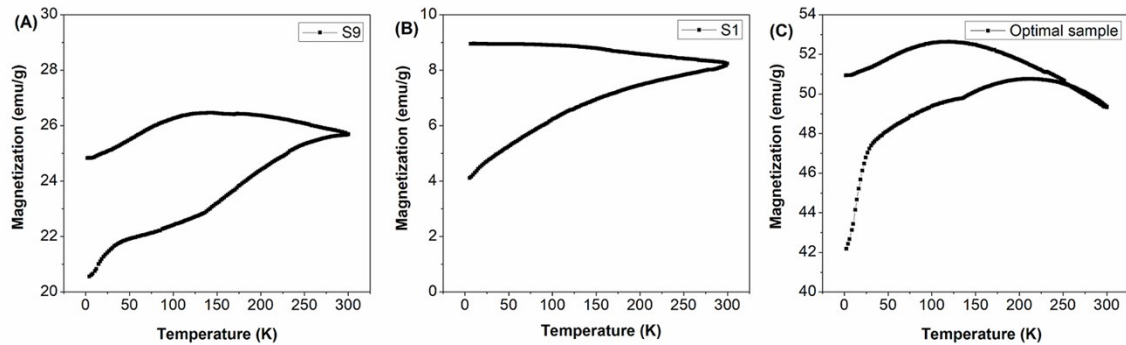

Figure S2: Magnetization as a function of temperature on application of 100 Oe field for  $Mn_xFe_{3-x}O_4$  nanoparticles exhibiting (A) maximum magnetization (run order 9; S9); (B) maximum temperature rise (run order 1; S1) and (C) optimal sample synthesized.

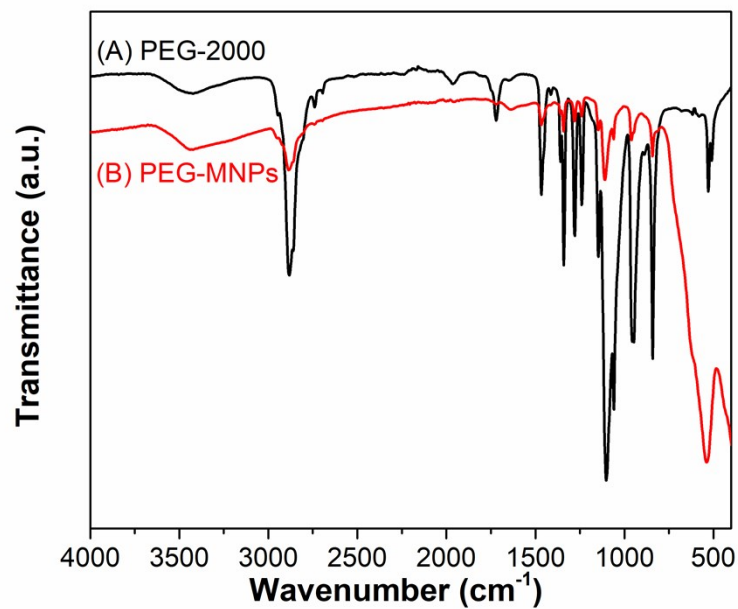

Figure S3: FTIR analysis of (A) PEG-2000 and (B) PEG-coated optimal MNPs.
